# Supplementary material
Source: MDPI journal article supplement (https://www.mdpi.com/2073-4395/14/2/368)
Supplement: s1 [file s1 › agronomy-2789766-supplementary.pdf]

Table S1 The QA/QC information for all measurements and analyzers used.

| Measured factors         | Quality control/analysis  |
|--------------------------|---------------------------|
| Enzyme activity          | 4-methylumbelliferone     |
| Total phosphorus         | Molybdenum blue           |
| Dissolved organic carbon | Sodium carbonate solution |

Table S2 The abbreviations of types, substrates, and functions of soil extracellular enzymes.

| Extracellular enzyme                 | Abbreviation | Substrate                                | Function                                            |
|--------------------------------------|--------------|------------------------------------------|-----------------------------------------------------|
| $\beta$ -1,4-glucosidase             | BG           | 4-MUB- $\beta$ -D-glucoside              | Releases glucose from cellulose                     |
| $\beta$ -1,4-xylosidase              | XYL          | 4-MUB- $\beta$ -D- xyloside              | Releases xylose from hemicellulose                  |
| Cellobiohydrolase                    | CBH          | 4-MUB- $\beta$ -D-cellobioside           | Releases disaccharides from cellulose               |
| $\beta$ -1,4-N-acetylglucosaminidase | NAG          | 4-MUB-N-acetyl- $\beta$ -D-glucosaminide | Releases N-acetyl glucosamine from oligosaccharides |
| L-leucine aminopeptidase             | LAP          | L-leucine-7-amido-4-methylcoumarin       | Releases methylcoumarin from chitin                 |

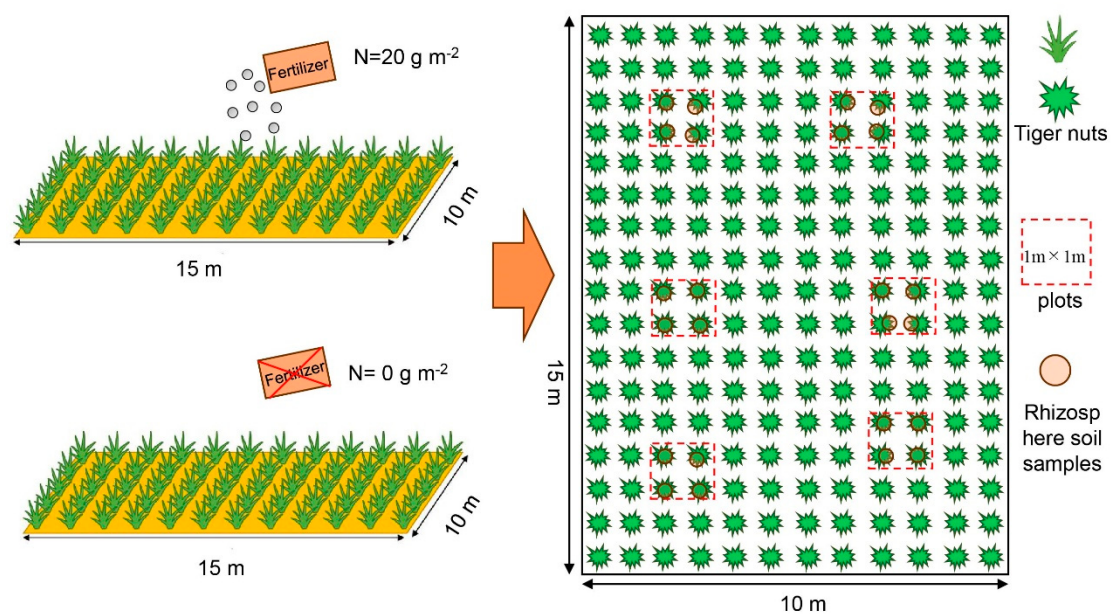

Figure S1 Two different fertilization treatments and sampling methods in study area.

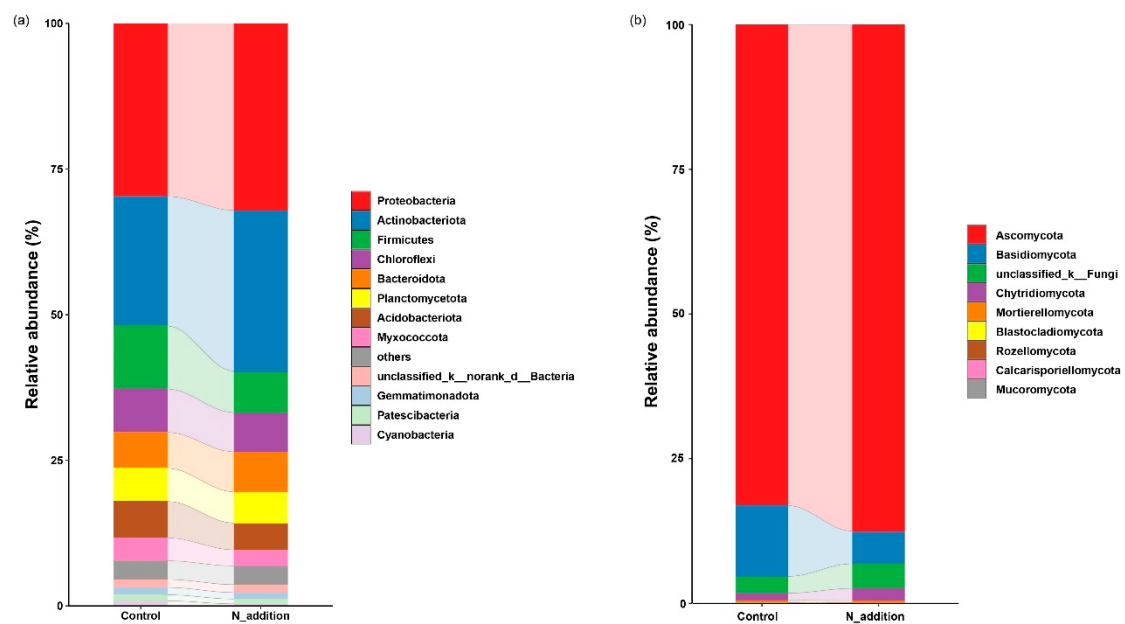

Figure S2 Rhizosphere microbial community composition of bacteria (a) and fungal (b) at the phylum level under N addition.

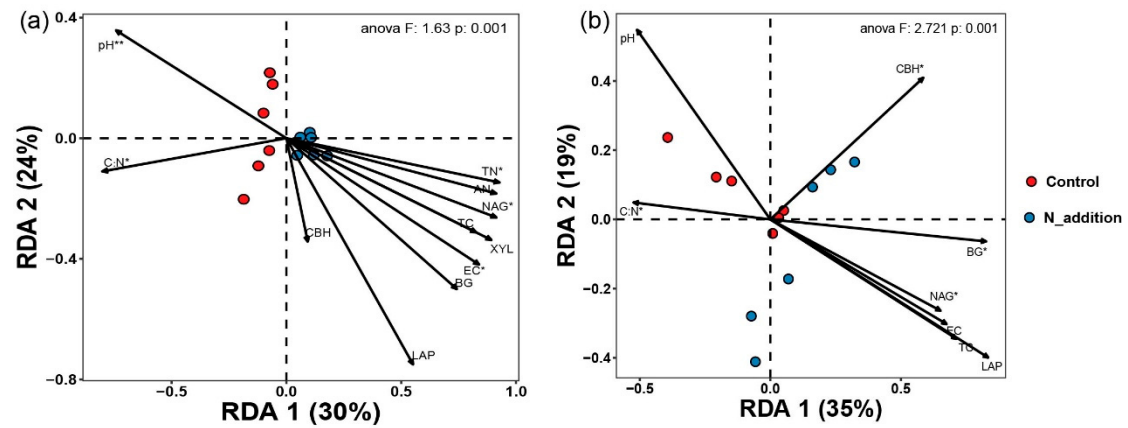

Figure S3 Redundancy analysis of environmental factors and rhizosphere bacterial (a) and fungal (b) microbial communities. The asterisks represent the significance ( $p < 0.05$ ) factor via forward selection.

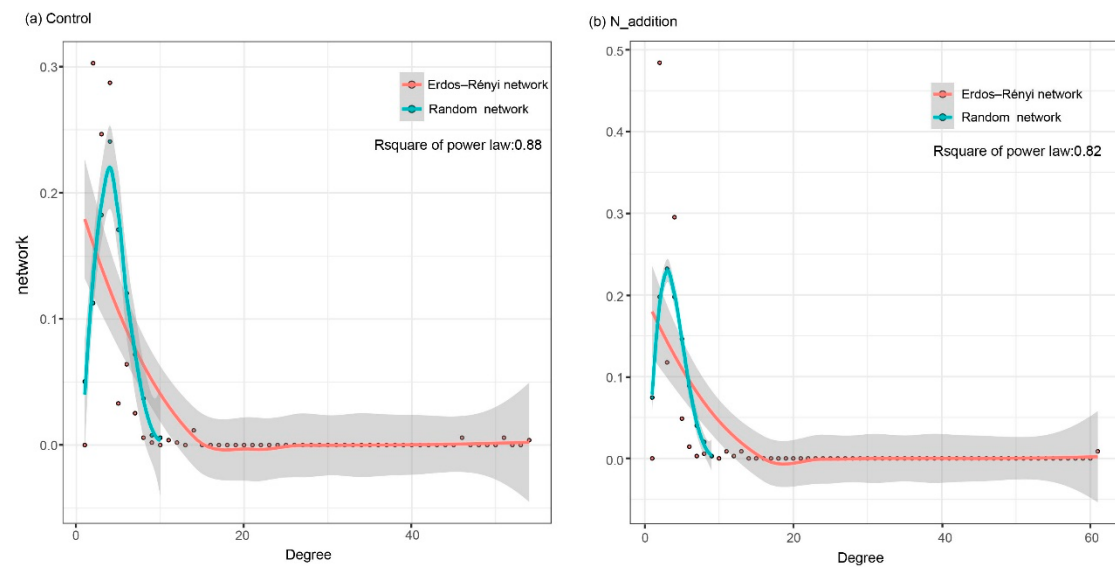

Figure S4 Network topological feature of degree distribution pattern of rhizosphere microbial.

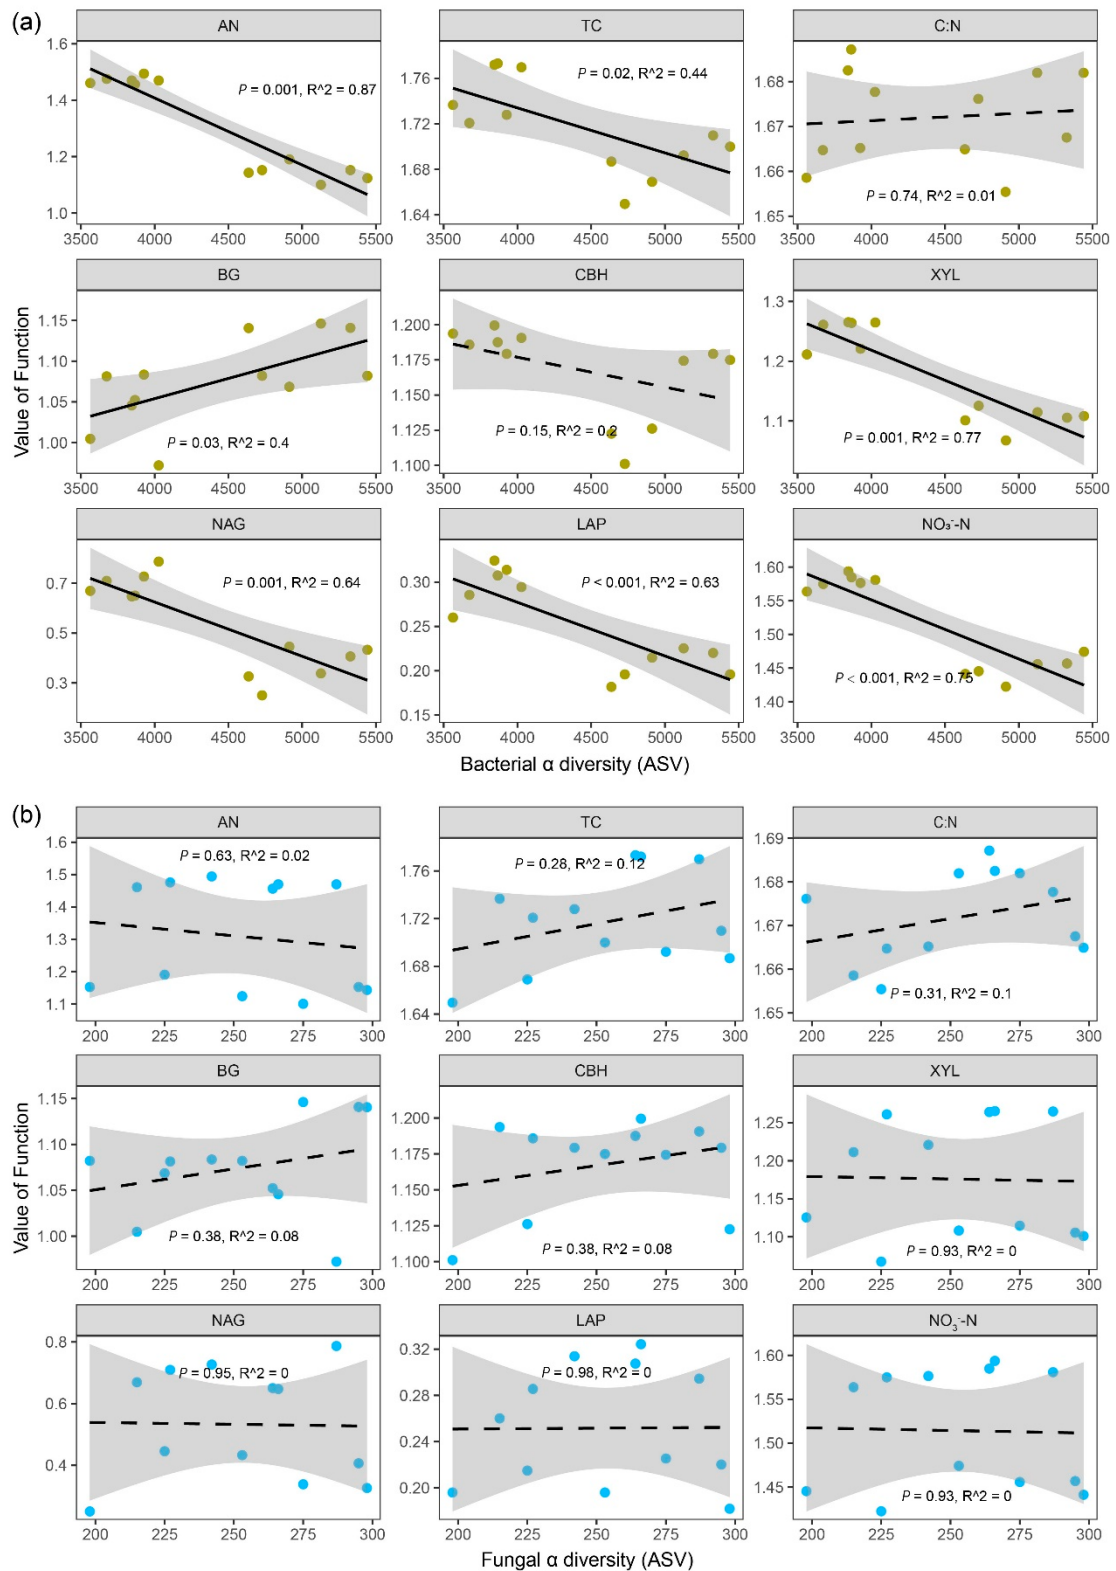

Figure S5 Relationships between rhizosphere soil bacterial (a) and fungal (b)  $\alpha$  diversity and individual soil function (N = 12). Solid and dashed lines denote statistically significant (two-sided  $p < 0.05$ ) and nonsignificant (two-sided  $p > 0.05$ ) relationships, respectively. The shaded areas show the 95% confidence interval of the fit. AN, TC, C: N, BG, CBH, XYL, NAG, LAP,  $\text{NO}_3^-$ -N and MBP were log transformed.

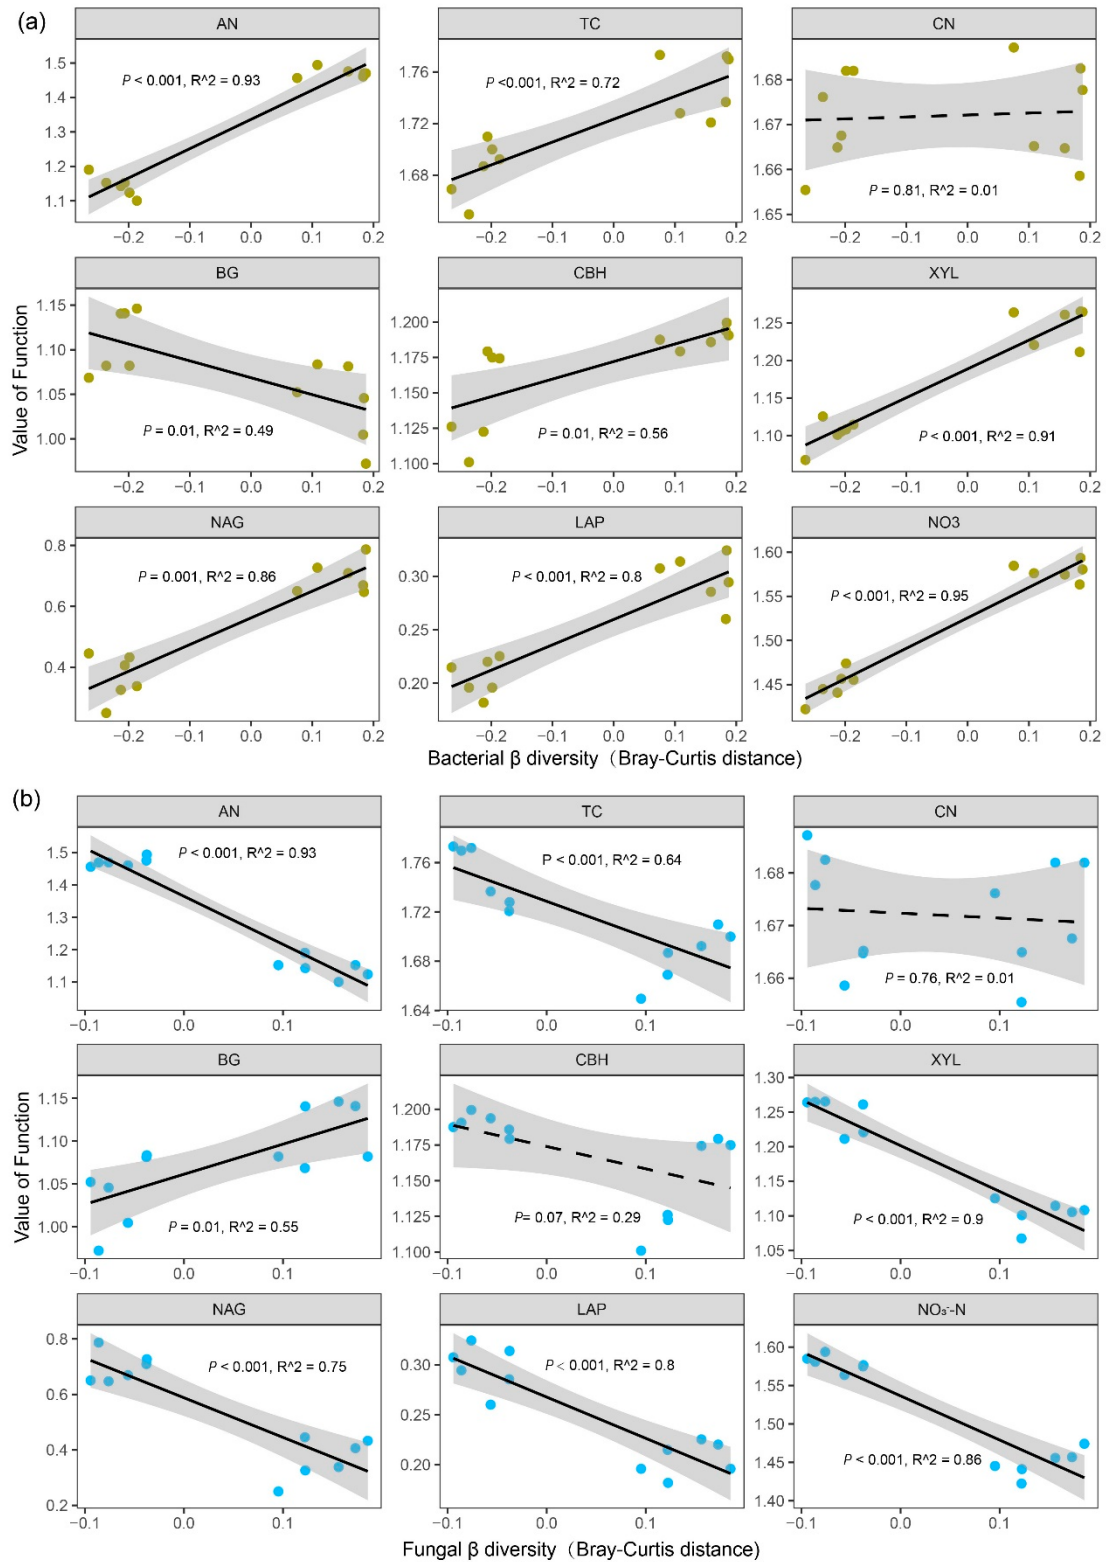

Figure S6 Relationships between rhizosphere soil bacterial (a) and fungal (b)  $\beta$  diversity and individual soil function (N = 12). Solid and dashed lines denote statistically significant (two-sided  $p < 0.05$ ) and nonsignificant (two-sided  $p > 0.05$ ) relationships, respectively. The shaded areas show the 95% confidence interval of the fit. AN, TC, C:N, BG, CBH, XYL, NAG, LAP, NO<sub>3</sub>-N and MBP were log transformed.
